# Supplementary material for: Silver(i) complexes with different pyridine-4,5-dicarboxylate ligands as efficient agents for the control of cow mastitis associated pathogens
Source: Royal Society of Chemistry journal article supplement (doi:10.1039/d0dt00518e), 2020-01-01
Supplement: d0dt00518e1.pdf [file d0dt00518e1.pdf]

**Silver(I) complexes with different pyridine-4,5-dicarboxylate ligands as efficient agents for the control of cow mastitis associated pathogens**

Tina P. Andrejević,<sup>a</sup> Dusan Milivojevic,<sup>b</sup> Biljana Đ. Glišić,<sup>a</sup> Jakob Kljun,<sup>c</sup> Nevena Lj. Stevanović,<sup>a</sup> Sandra Vojnovic,<sup>b</sup> Strahinja Medic,<sup>d</sup> Jasmina Nikodinovic-Runic,<sup>\*b</sup> Iztok Turel,<sup>\*c</sup> and Miloš I. Djuran<sup>\*e</sup>

<sup>a</sup>*University of Kragujevac, Faculty of Science, Department of Chemistry, R. Domanovića 12, 34000 Kragujevac, Serbia*

<sup>b</sup>*Institute of Molecular Genetics and Genetic Engineering, University of Belgrade, Vojvode Stepe 444a, 11042 Belgrade, Serbia*

<sup>c</sup>*University of Ljubljana, Faculty of Chemistry and Chemical Technology, Večna pot 113, SI-1000, Ljubljana, Slovenia*

<sup>d</sup>*Vetlab d.o.o., Bulevar Franše D' Eperea 8, 11000 Belgrade, Serbia*

<sup>e</sup>*Serbian Academy of Sciences and Arts, Knez Mihailova 35, 11000 Belgrade, Serbia*

\*Corresponding authors. Tel.: +381 11 397 6034 (J. Nikodinovic-Runic); Tel.: +386 1 47 98 525 (I. Turel); Tel.: +381 34 300 251 (M.I. Djuran).

*E-mail addresses:* [jasmina.nikodinovic@imgge.bg.ac.rs](mailto:jasmina.nikodinovic@imgge.bg.ac.rs) (J. Nikodinovic-Runic); [Iztok.Turel@fkkt.uni-lj.si](mailto:Iztok.Turel@fkkt.uni-lj.si) (I. Turel); [milos.djuran@pmf.kg.ac.rs](mailto:milos.djuran@pmf.kg.ac.rs) (M.I. Djuran).

## Abstract

Infections of the cow udder leading to mastitis and lower milk quality are one of the biggest problems in the dairy industry worldwide. Unfortunately, therapeutic options for the treatment of cow mastitis are limited as the consequence of pathogens resistance development to conventionally used antibiotics. In a search for the agents, which will be active against cow mastitis associated pathogens, in the present study, five new silver(I) complexes with different chelating pyridine-4,5-dicarboxylate type of ligands,  $[\text{Ag}(\text{NO}_3)(\text{py-2py})]_n$  (**1**),  $[\text{Ag}(\text{NO}_3)(\text{py-2metz})]_n$  (**2**),  $[\text{Ag}(\text{CH}_3\text{CN})(\text{py-2py})]\text{BF}_4$  (**3**),  $[\text{Ag}(\text{py-2tz})_2]\text{BF}_4$  (**4**) and  $[\text{Ag}(\text{py-2metz})_2]\text{BF}_4$  (**5**), py-2py is dimethyl 2,2'-bipyridine-4,5-dicarboxylate, py-2metz is dimethyl 2-(4-methylthiazol-2-yl)pyridine-4,5-dicarboxylate and py-2tz is dimethyl 2-(thiazol-2-yl)pyridine-4,5-dicarboxylate, were synthesized, structurally characterized and assessed for *in vitro* antimicrobial activity using both standard bioassay and clinical isolates from the contaminated milk sample originating from the cow with mastitis. These complexes showed remarkable activity against the standard panel of microorganisms as well as selection of clinical isolates from the milk of cow diagnosed with mastitis. With the aim to determine the therapeutic potential of the silver(I) complexes, their toxicity *in vivo* against the model organism, *Caenorhabditis elegans* (*C. elegans*) was investigated. The complexes which had the best therapeutic profile, **2** and **5**, induced bacterial membrane depolarization, production of the reactive oxygen species (ROS) in *Candida albicans* cells and inhibited the hyphae, as well as the biofilm formation. Taken together, the presented data suggest that the silver(I) complexes with pyridine ligands could be considered for the treatment of microbial pathogens, which are causative agents of cow mastitis.

**Keywords:** Silver(I) complexes; Pyridine-4,5-dicarboxylates; Cow mastitis; Antimicrobial activity; *Caenorhabditis elegans*

## TABLE OF CONTENTS

|                                                                                                                                                                                                                                  |     |
|----------------------------------------------------------------------------------------------------------------------------------------------------------------------------------------------------------------------------------|-----|
| <sup>1</sup> H NMR spectrum of dimethyl 2,2'-bipyridine-4,5-dicarboxylate (py-2py)                                                                                                                                               | S4  |
| <sup>1</sup> H NMR spectrum of dimethyl 2-(4-methylthiazol-2-yl)pyridine-4,5-dicarboxylate (py-2metz)                                                                                                                            | S5  |
| <sup>1</sup> H NMR spectrum of 2-(thiazol-2-yl)pyridine-4,5-dicarboxylate (py-2tz)                                                                                                                                               | S6  |
| <b>Fig. S1</b> Air/light stability of silver(I) complexes <b>1 – 5</b> .                                                                                                                                                         | S7  |
| <b>Fig. S2</b> Antibiofilm activity of <b>2</b> and <b>5</b> against <i>S. aureus</i> biofilms formed in the presence of sub-inhibitory concentrations of complexes for 24 h. The amount of DMSO was 0.1% (v/v).                 | S8  |
| <b>Fig. S3</b> Antibiofilm activity of <b>2</b> and <b>5</b> against <i>C. albicans</i> biofilms formed in the presence of subinhibitory concentrations of complexes for A) 24 h and B) 48 h. The amount of DMSO was 0.1% (v/v). | S9  |
| <b>Table S1</b> ROS positive <i>C. albicans</i> cells detected by flow cytometry (fluorescence due to DCFH-DA (2',7'-dichlorofluorescein diacetate) probe oxidation)                                                             | S10 |
| <b>Table S2</b> Crystallographic data for silver(I) complexes <b>1 – 5</b>                                                                                                                                                       | S11 |

<sup>1</sup>H NMR spectrum of dimethyl 2,2'-bipyridine-4,5-dicarboxylate (py-2py)

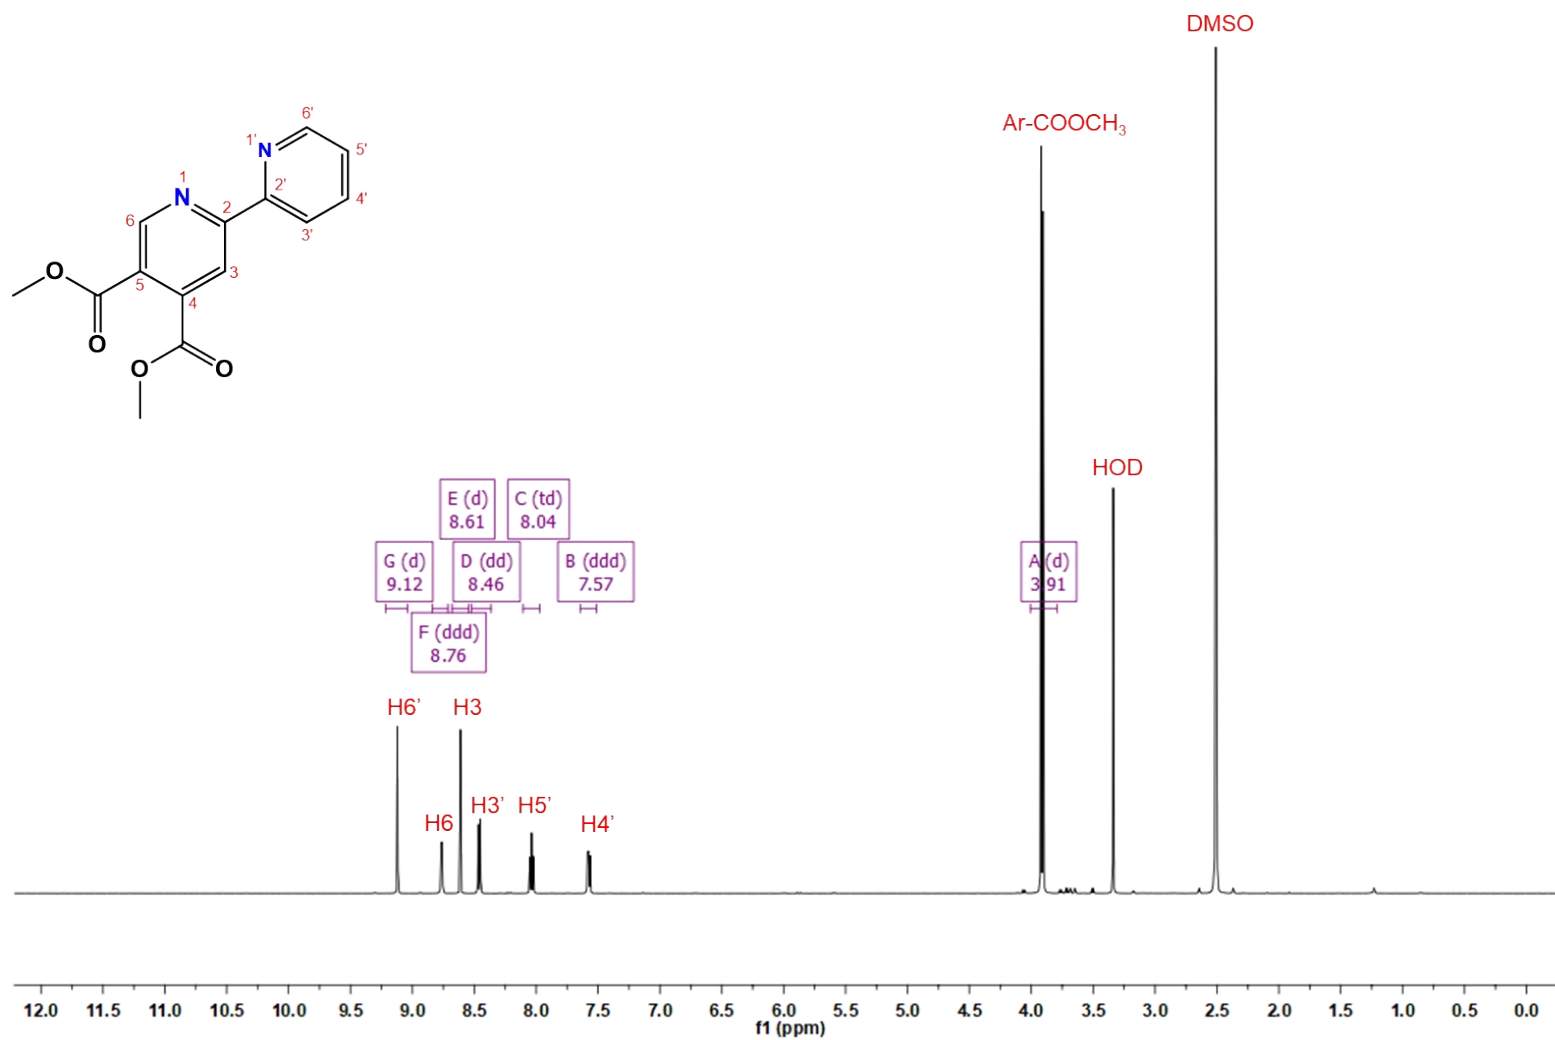

<sup>1</sup>H NMR spectrum of dimethyl 2-(4-methylthiazol-2-yl)pyridine-4,5-dicarboxylate (py-2metz)

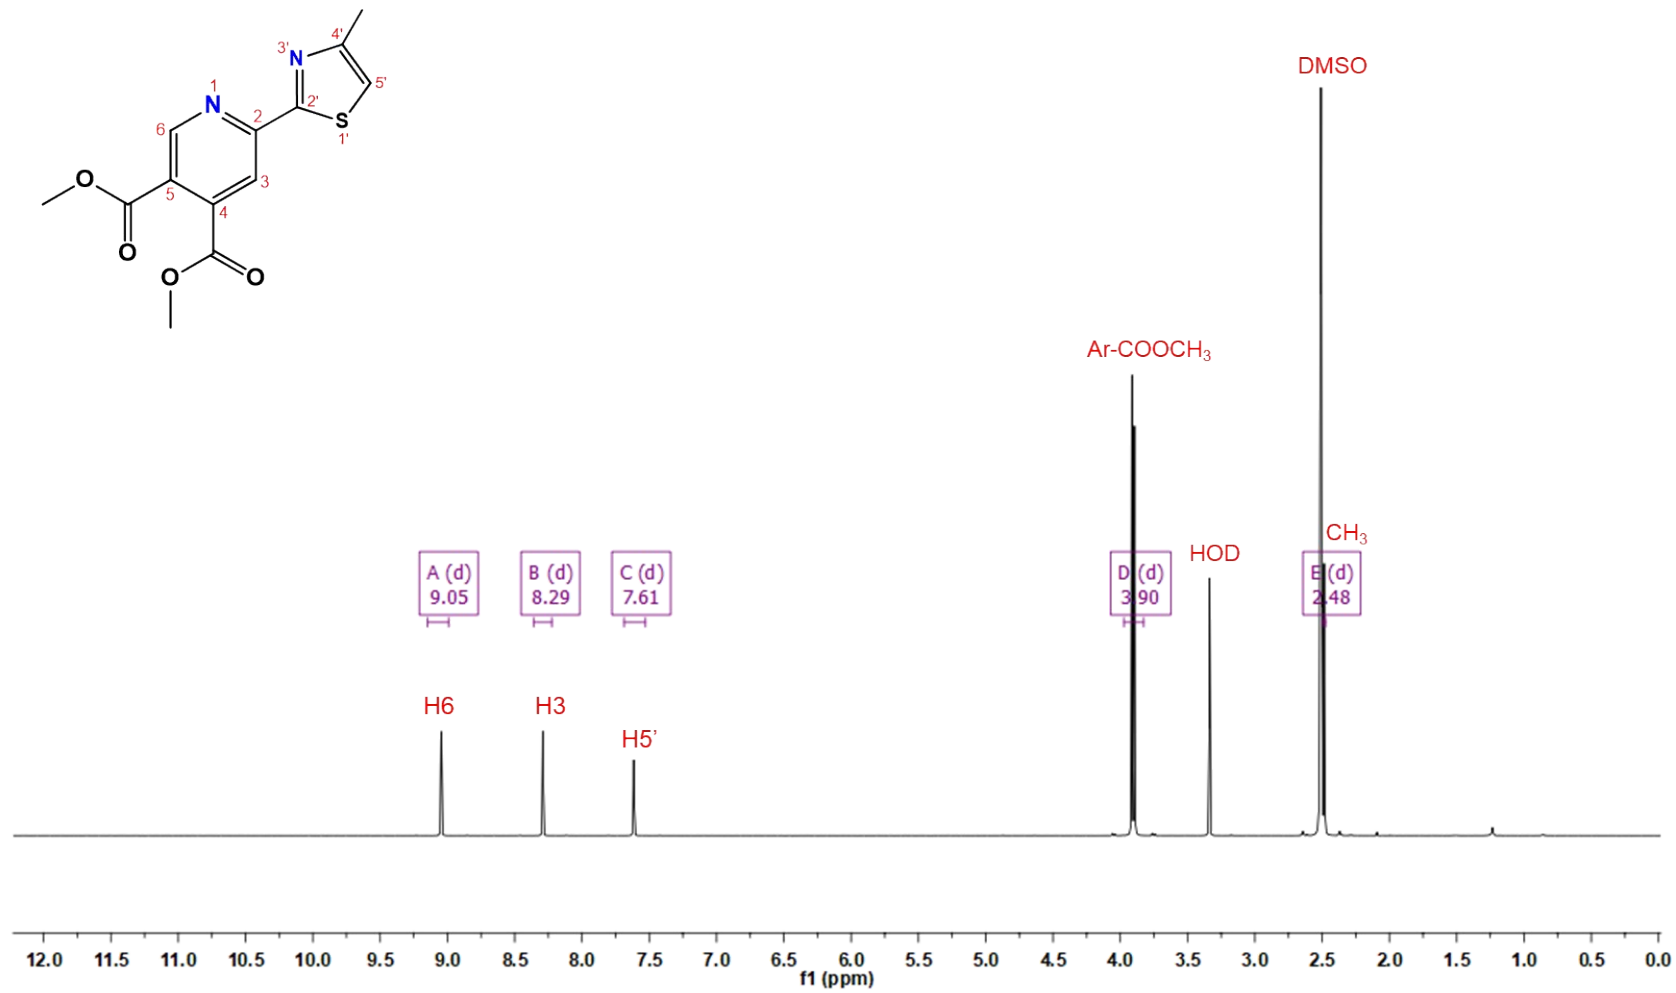

<sup>1</sup>H NMR spectrum of 2-(thiazol-2-yl)pyridine-4,5-dicarboxylate (py-2tz)

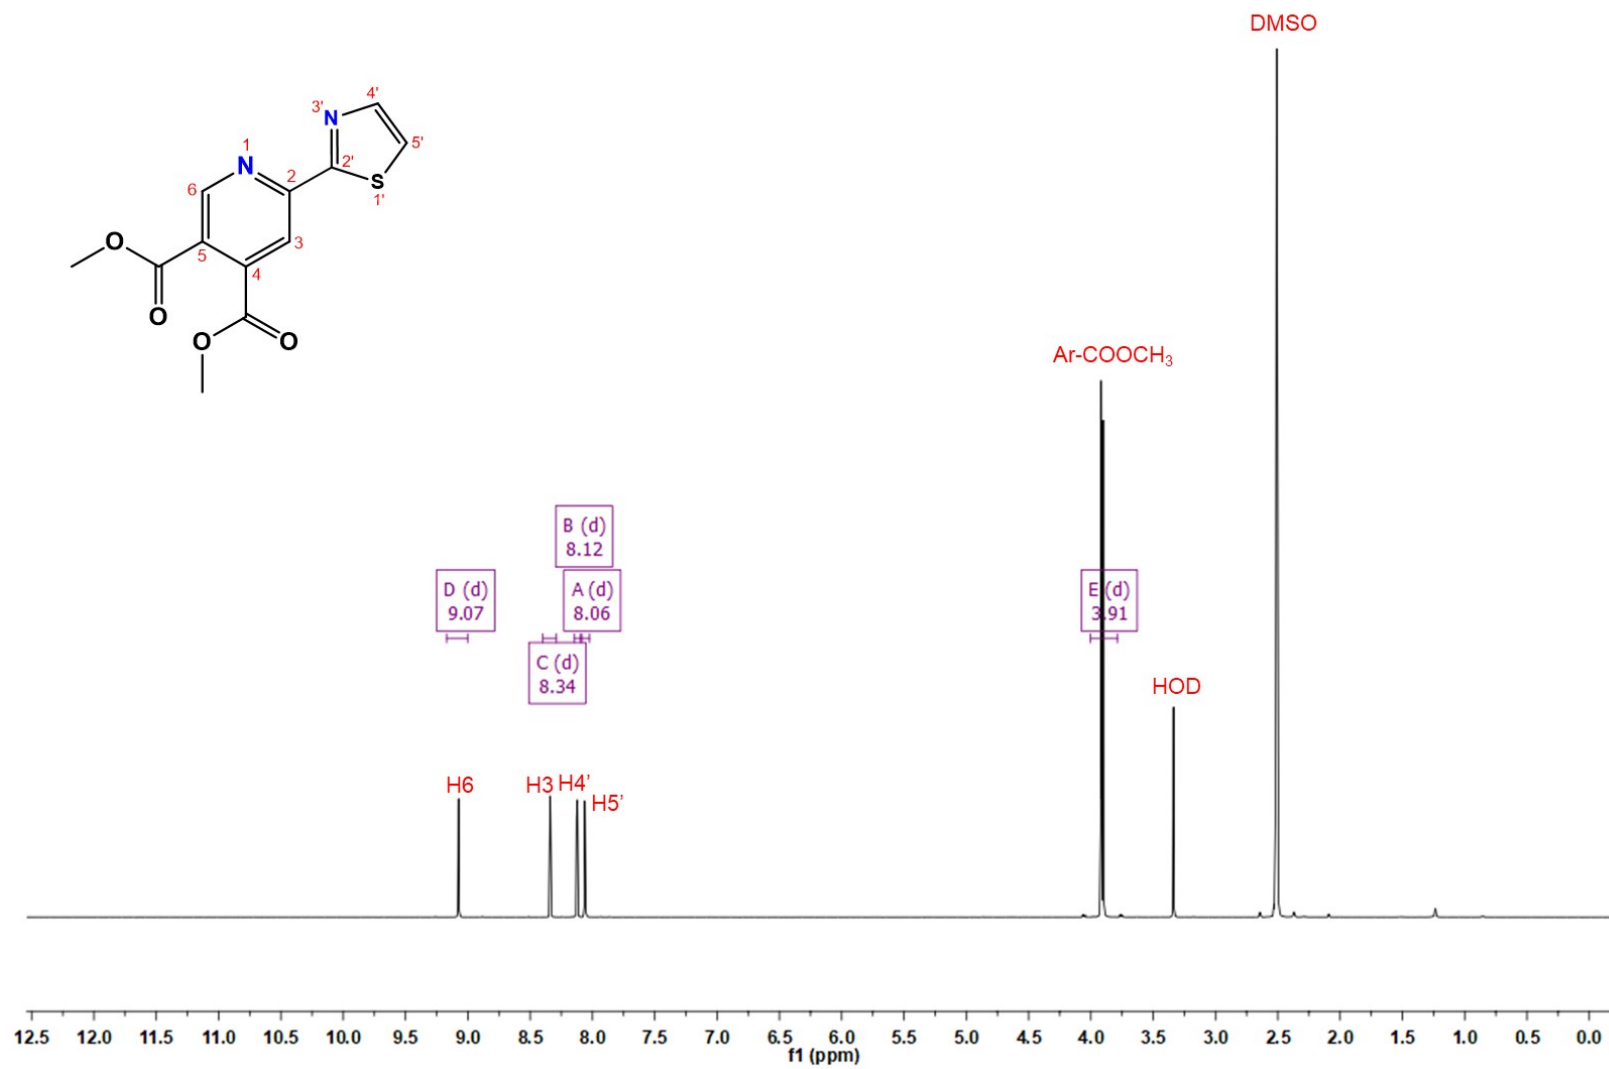

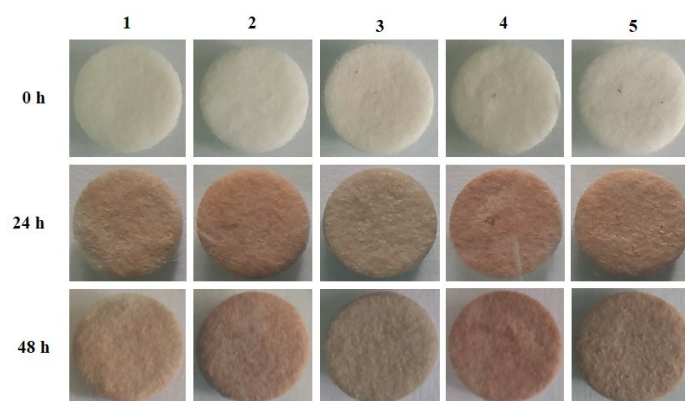

**Fig. S1** Air/light stability of silver(I) complexes 1 – 5.

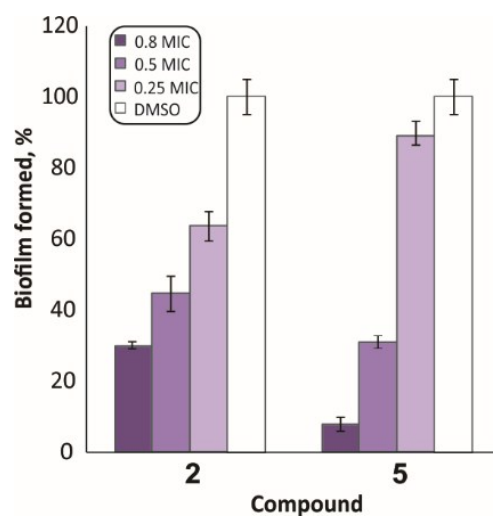

**Fig. S2** Antibiofilm activity of **2** and **5** against *S. aureus* biofilms formed in the presence of sub-inhibitory concentrations of complexes for 24 h. The amount of DMSO was 0.1% (v/v).



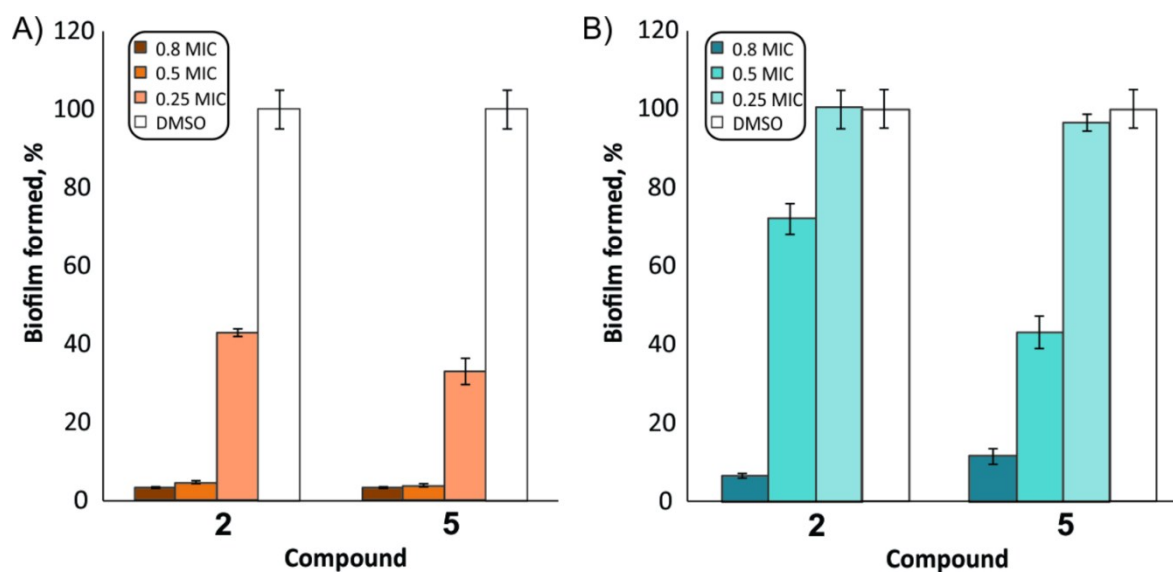

**Fig. S3** Antibiofilm activity of **2** and **5** against *C. albicans* biofilms formed in the presence of sub-inhibitory concentrations of complexes for A) 24 h and B) 48 h. The amount of DMSO was 0.1% (v/v).

**Table S1** ROS positive *C. albicans* cells detected by flow cytometry (fluorescence due to DCFH-DA (2',7'-dichlorofluorescein diacetate) probe oxidation)

| Treatment      | ROS <sup>+</sup> , % <sup>a</sup> |
|----------------|-----------------------------------|
| Control (DMSO) | 3.5                               |
| <b>2</b>       | 9.1                               |
| <b>5</b>       | 18.7                              |
| AmB            | 23.0                              |

<sup>a</sup>percent of ROS<sup>+</sup> cells was determined by Partec FloMax software, whereby the baseline of zero (background level of fluorescence) was set based on the maximum value of the control sample without the ROS indicator. The percentage of ROS-positive cells was determined by counting cells with the higher ROS level than background and conversion into percentage.

**Table S2** Crystallographic data for silver(I) complexes **1 – 5**

| Compound                                   | <b>Ag1</b>                                                       | <b>Ag2</b>                                                        |
|--------------------------------------------|------------------------------------------------------------------|-------------------------------------------------------------------|
| Empirical formula                          | C <sub>14</sub> H <sub>12</sub> AgN <sub>3</sub> O <sub>7</sub>  | C <sub>13</sub> H <sub>12</sub> AgN <sub>3</sub> O <sub>7</sub> S |
| Formula weight                             | 442.14                                                           | 462.19                                                            |
| Temperature/K                              | 150.00(10)                                                       | 150.00(10)                                                        |
| Crystal system                             | monoclinic                                                       | monoclinic                                                        |
| Space group                                | P2 <sub>1</sub> /c                                               | P2 <sub>1</sub> /c                                                |
| a/Å                                        | 12.3460(6)                                                       | 11.8454(6)                                                        |
| b/Å                                        | 7.4026(4)                                                        | 7.2758(4)                                                         |
| c/Å                                        | 16.9382(7)                                                       | 18.8865(10)                                                       |
| α/°                                        | 90                                                               | 90                                                                |
| β/°                                        | 104.169(4)                                                       | 107.701(5)                                                        |
| γ/°                                        | 90                                                               | 90                                                                |
| Volume/Å <sup>3</sup>                      | 1500.93(13)                                                      | 1550.67(15)                                                       |
| Z                                          | 4                                                                | 4                                                                 |
| ρ <sub>calc</sub> /cm <sup>3</sup>         | 1.957                                                            | 1.980                                                             |
| μ/mm <sup>-1</sup>                         | 1.390                                                            | 1.479                                                             |
| F(000)                                     | 880.0                                                            | 920.0                                                             |
| Crystal size/mm <sup>3</sup>               | 0.1 × 0.1 × 0.03                                                 | 0.2 × 0.1 × 0.1                                                   |
| Radiation                                  | MoKα (λ = 0.71073)                                               | MoKα (λ = 0.71073)                                                |
| 2θ range for data coll./°                  | 5.284 to 54.968                                                  | 4.858 to 54.962                                                   |
| Index ranges                               | -16 ≤ h ≤ 13,<br>-9 ≤ k ≤ 6,<br>-19 ≤ l ≤ 21                     | -15 ≤ h ≤ 11,<br>-9 ≤ k ≤ 6,<br>-24 ≤ l ≤ 24                      |
| Reflections collected                      | 7600                                                             | 7288                                                              |
| Independent reflections                    | 3438<br>[R <sub>int</sub> = 0.0261, R <sub>sigma</sub> = 0.0381] | 3560<br>[R <sub>int</sub> = 0.0275, R <sub>sigma</sub> = 0.0400]  |
| Data/restraints/parameters                 | 3438/0/228                                                       | 3560/0/229                                                        |
| Goodness-of-fit on F <sup>2</sup>          | 1.070                                                            | 1.042                                                             |
| Final R indexes [I ≥ 2σ (I)]               | R <sub>1</sub> = 0.0292, wR <sub>2</sub> = 0.0620                | R <sub>1</sub> = 0.0297, wR <sub>2</sub> = 0.0707                 |
| Final R indexes [all data]                 | R <sub>1</sub> = 0.0400, wR <sub>2</sub> = 0.0694                | R <sub>1</sub> = 0.0382, wR <sub>2</sub> = 0.0773                 |
| Largest diff. peak/hole / eÅ <sup>-3</sup> | 0.41/-0.66                                                       | 0.44/-1.08                                                        |

| Compound          | <b>Ag3</b>                                                                                                  | <b>Ag4</b>                                                                                     |
|-------------------|-------------------------------------------------------------------------------------------------------------|------------------------------------------------------------------------------------------------|
| Empirical formula | C <sub>32</sub> H <sub>30</sub> Ag <sub>2</sub> B <sub>2</sub> F <sub>8</sub> N <sub>6</sub> O <sub>8</sub> | C <sub>24</sub> H <sub>20</sub> AgBF <sub>4</sub> N <sub>4</sub> O <sub>8</sub> S <sub>2</sub> |
| Formula weight    | 1015.98                                                                                                     | 751.24                                                                                         |
| Temperature/K     | 150.00(10)                                                                                                  | 150.00(10)                                                                                     |
| Crystal system    | triclinic                                                                                                   | monoclinic                                                                                     |
| Space group       | P-1                                                                                                         | P2 <sub>1</sub> /n                                                                             |
| a/Å               | 6.8388(6)                                                                                                   | 12.2044(5)                                                                                     |
| b/Å               | 11.9872(9)                                                                                                  | 7.9645(3)                                                                                      |
| c/Å               | 12.9686(9)                                                                                                  | 29.6530(9)                                                                                     |

Electronic Supplementary Information

|                                                     |                                                                      |                                                                       |
|-----------------------------------------------------|----------------------------------------------------------------------|-----------------------------------------------------------------------|
| $\alpha/^\circ$                                     | 113.877(7)                                                           | 90                                                                    |
| $\beta/^\circ$                                      | 93.318(6)                                                            | 97.886(3)                                                             |
| $\gamma/^\circ$                                     | 100.412(7)                                                           | 90                                                                    |
| Volume/ $\text{\AA}^3$                              | 945.94(14)                                                           | 2855.07(18)                                                           |
| Z                                                   | 1                                                                    | 4                                                                     |
| $\rho_{\text{calc}}/\text{g/cm}^3$                  | 1.783                                                                | 1.748                                                                 |
| $\mu/\text{mm}^{-1}$                                | 1.132                                                                | 0.934                                                                 |
| F(000)                                              | 504.0                                                                | 1504.0                                                                |
| Crystal size/ $\text{mm}^3$                         | $0.4 \times 0.1 \times 0.1$                                          | $0.3 \times 0.1 \times 0.1$                                           |
| Radiation                                           | MoK $\alpha$ ( $\lambda = 0.71073$ )                                 | MoK $\alpha$ ( $\lambda = 0.71073$ )                                  |
| 2 $\theta$ range for data coll./ $^\circ$           | 6.122 to 54.968                                                      | 5.3 to 54.97                                                          |
| Index ranges                                        | $-7 \leq h \leq 8,$<br>$-12 \leq k \leq 15,$<br>$-16 \leq l \leq 12$ | $-15 \leq h \leq 15,$<br>$-10 \leq k \leq 8,$<br>$-28 \leq l \leq 38$ |
| Reflections collected                               | 6739                                                                 | 13853                                                                 |
| Independent reflections                             | 4334<br>[ $R_{\text{int}} = 0.0195, R_{\text{sigma}} = 0.0403$ ]     | 6545<br>[ $R_{\text{int}} = 0.0235, R_{\text{sigma}} = 0.0365$ ]      |
| Data/restraints/parameters                          | 4334/0/293                                                           | 6545/0/438                                                            |
| Goodness-of-fit on $F^2$                            | 1.067                                                                | 1.019                                                                 |
| Final R indexes [ $I \geq 2\sigma(I)$ ]             | $R_1 = 0.0391, wR_2 = 0.0878$                                        | $R_1 = 0.0293, wR_2 = 0.0641$                                         |
| Final R indexes [all data]                          | $R_1 = 0.0539, wR_2 = 0.0986$                                        | $R_1 = 0.0391, wR_2 = 0.0688$                                         |
| Largest diff. peak/hole / $\text{e}\text{\AA}^{-3}$ | 1.02/-1.45                                                           | 0.40/-0.51                                                            |

| Compound                                  | <b>Ag5</b>                                                              |
|-------------------------------------------|-------------------------------------------------------------------------|
| Empirical formula                         | $\text{C}_{26}\text{H}_{24}\text{AgBF}_4\text{N}_4\text{O}_8\text{S}_2$ |
| Formula weight                            | 779.29                                                                  |
| Temperature/K                             | 150.00(10)                                                              |
| Crystal system                            | monoclinic                                                              |
| Space group                               | $P2_1/c$                                                                |
| a/ $\text{\AA}$                           | 10.5822(5)                                                              |
| b/ $\text{\AA}$                           | 24.4148(8)                                                              |
| c/ $\text{\AA}$                           | 12.6708(5)                                                              |
| $\alpha/^\circ$                           | 90                                                                      |
| $\beta/^\circ$                            | 114.002(6)                                                              |
| $\gamma/^\circ$                           | 90                                                                      |
| Volume/ $\text{\AA}^3$                    | 2990.6(2)                                                               |
| Z                                         | 4                                                                       |
| $\rho_{\text{calc}}/\text{g/cm}^3$        | 1.731                                                                   |
| $\mu/\text{mm}^{-1}$                      | 0.895                                                                   |
| F(000)                                    | 1568.0                                                                  |
| Crystal size/ $\text{mm}^3$               | $0.1 \times 0.1 \times 0.05$                                            |
| Radiation                                 | MoK $\alpha$ ( $\lambda = 0.71073$ )                                    |
| 2 $\theta$ range for data coll./ $^\circ$ | 4.85 to 54.958                                                          |

*Electronic Supplementary Information*

|                                            |                                                                  |
|--------------------------------------------|------------------------------------------------------------------|
| Index ranges                               | -13 ≤ h ≤ 13,<br>-31 ≤ k ≤ 23,<br>-16 ≤ l ≤ 11                   |
| Reflections collected                      | 13217                                                            |
| Independent reflections                    | 6852<br>[R <sub>int</sub> = 0.0260, R <sub>sigma</sub> = 0.0401] |
| Data/restraints/parameters                 | 6852/0/421                                                       |
| Goodness-of-fit on F <sup>2</sup>          | 1.037                                                            |
| Final R indexes [I ≥ 2σ (I)]               | R <sub>1</sub> = 0.0325, wR <sub>2</sub> = 0.0758                |
| Final R indexes [all data]                 | R <sub>1</sub> = 0.0442, wR <sub>2</sub> = 0.0832                |
| Largest diff. peak/hole / eÅ <sup>-3</sup> | 0.63/-0.53                                                       |
